# Supplementary material for: Effect of Text Messaging on Bowel Preparation and Appointment Attendance for Outpatient Colonoscopy: A Randomized Clinical Trial
Source: PubMed Central journal article supplement (PMC7835713; doi:10.1001/jamanetworkopen.2020.34553), 2021-01-25
Supplement: jamanetwopen-e2034553-s002.pdf [file jamanetwopen-e2034553-s002.pdf]

## **Data Sharing Statement**

Mahmud. Effect of Text Messaging on Bowel Preparation and Appointment Attendance for Outpatient Colonoscopy. *JAMA Network Open*. Published January 25, 2021.

doi:10.1001/jamanetworkopen.2020.34553

### **Data**

**Data available:** No
